# Supplementary material for: Methodological Framework for World Health Organization Estimates of the Global Burden of Foodborne Disease
Source: PLoS One. 2015 Dec 3;10(12):e0142498. doi: 10.1371/journal.pone.0142498 (PMC4668830; doi:10.1371/journal.pone.0142498)
Supplement: S2 File — (XLSX) [file pone.0142498.s004.xlsx]

## Sheet: RATE
	Node name:
	Comments:
							Incidence per 100,000 (annual)					Distribution:	Percentiles
No	Country Name	WHO Region	WHO sub-Region	GEMS Region	GEMS (17) Region	GBD Region	0%	2.5%	5%	25%	50%	75%	95%	97.5%	100%	Age group	Sex group	Duration group	Comments
1	Afghanistan	EMRO	D	G	C 01	Asia, South
2	Albania	EURO	B	D	C 02	Europe, Central
3	Algeria	AFRO	D	C	C 01	North Africa / Middle East
4	Andorra	EURO	A	n/a	n/a	Europe, Western
5	Angola	AFRO	D	A	C 03	Sub-Saharan Africa, Central
6	Antigua and Barbuda	AMRO	B	K	C 04	Caribbean
7	Argentina	AMRO	B	M	C 05	Latin America, Southern
8	Armenia	EURO	B	D	C 06	Asia, Central
9	Australia	WPRO	A	M	C 07	Australasia
10	Austria	EURO	A	E	C 08	Europe, Western
11	Azerbaijan	EURO	B	D	C 01	Asia, Central
12	Bahamas	AMRO	B	K	C 04	Caribbean
13	Bahrain	EMRO	B	n/a	n/a	North Africa / Middle East
14	Bangladesh	SEARO	D	G	C 09	Asia, South
15	Barbados	AMRO	B	K	C 04	Caribbean
16	Belarus	EURO	C	D	C 10	Europe, Eastern
17	Belgium	EURO	A	E	C 11	Europe, Western
18	Belize	AMRO	B	K	C 12	Caribbean
19	Benin	AFRO	D	I	C 03	Sub-Saharan Africa, West
20	Bhutan	SEARO	D	n/a	n/a	Asia, South
21	Bolivia (Plurinational State of)	AMRO	D	H	C 05	Latin America, Andean
22	Bosnia and Herzegovina	EURO	B	D	C 02	Europe, Central
23	Botswana	AFRO	E	I	C 13	Sub-Saharan Africa, Southern
24	Brazil	AMRO	B	K	C 05	Latin America, Tropical
25	Brunei Darussalam	WPRO	A	L	C 04	Asia Pacific, High Income
26	Bulgaria	EURO	B	D	C 10	Europe, Central
27	Burkina Faso	AFRO	D	J	C 13	Sub-Saharan Africa, West
28	Burundi	AFRO	E	A	C 03	Sub-Saharan Africa, East
29	Cambodia	WPRO	B	G	C 09	Asia, South East
30	Cameroon	AFRO	D	A	C 03	Sub-Saharan Africa, West
31	Canada	AMRO	A	M	C 10	North America, High Income
32	Cape Verde	AFRO	D	I	C 05	Sub-Saharan Africa, West
33	Central African Republic	AFRO	E	A	C 13	Sub-Saharan Africa, Central
34	Chad	AFRO	D	J	C 13	Sub-Saharan Africa, West
35	Chile	AMRO	B	M	C 05	Latin America, Southern
36	China	WPRO	B	G	C 09	Asia, East
37	Colombia	AMRO	B	K	C 05	Latin America, Central
38	Comoros	AFRO	D	A	C 14	Sub-Saharan Africa, East
39	Congo	AFRO	E	J	C 03	Sub-Saharan Africa, Central
40	Cook Islands	WPRO	B	n/a	n/a	Oceania
41	Costa Rica	AMRO	B	K	C 05	Latin America, Central
42	Côte d'Ivoire	AFRO	E	A	C 03	Sub-Saharan Africa, West
43	Croatia	EURO	A	E	C 10	Europe, Central
44	Cuba	AMRO	A	K	C 06	Caribbean
45	Cyprus	EURO	A	B	C 10	Europe, Western
46	Czech Republic	EURO	A	E	C 15	Europe, Central
47	Democratic People's Republic of Korea	SEARO	D	L	C 09	Asia, East
48	Democratic Republic of the Congo	AFRO	E	J	C 03	Sub-Saharan Africa, Central
49	Denmark	EURO	A	E	C 15	Europe, Western
50	Djibouti	EMRO	D	A	C 05	Sub-Saharan Africa, East
51	Dominica	AMRO	B	K	C 12	Caribbean
52	Dominican Republic	AMRO	B	K	C 05	Caribbean
53	Ecuador	AMRO	D	K	C 05	Latin America, Andean
54	Egypt	EMRO	D	C	C 06	North Africa / Middle East
55	El Salvador	AMRO	B	H	C 05	Latin America, Central
56	Equatorial Guinea	AFRO	D	n/a	n/a	Sub-Saharan Africa, Central
57	Eritrea	AFRO	E	A	n/a	Sub-Saharan Africa, East
58	Estonia	EURO	C	F	C 10	Europe, Eastern
59	Ethiopia	AFRO	E	A	n/a	Sub-Saharan Africa, East
60	Fiji	WPRO	B	L	C 14	Oceania
61	Finland	EURO	A	F	C 07	Europe, Western
62	France	EURO	A	E	C 07	Europe, Western
63	Gabon	AFRO	D	A	C 16	Sub-Saharan Africa, Central
64	Gambia	AFRO	D	J	C 13	Sub-Saharan Africa, West
65	Georgia	EURO	B	D	C 02	Asia, Central
66	Germany	EURO	A	E	C 08	Europe, Western
67	Ghana	AFRO	D	I	C 03	Sub-Saharan Africa, West
68	Greece	EURO	A	B	C 06	Europe, Western
69	Grenada	AMRO	B	K	C 04	Caribbean
70	Guatemala	AMRO	D	H	C 05	Latin America, Central
71	Guinea	AFRO	D	A	C 03	Sub-Saharan Africa, West
72	Guinea-Bissau	AFRO	D	A	C 09	Sub-Saharan Africa, West
73	Guyana	AMRO	B	K	C 05	Caribbean
74	Haiti	AMRO	D	H	C 13	Caribbean
75	Honduras	AMRO	B	H	C 05	Latin America, Central
76	Hungary	EURO	C	E	C 15	Europe, Central
77	Iceland	EURO	A	F	C 07	Europe, Western
78	India	SEARO	D	G	C 05	Asia, South
79	Indonesia	SEARO	B	G	C 09	Asia, South East
80	Iran (Islamic Republic of)	EMRO	B	D	C 06	North Africa / Middle East
81	Iraq	EMRO	D	C	C 01	North Africa / Middle East
82	Ireland	EURO	A	E	C 15	Europe, Western
83	Israel	EURO	A	B	C 04	Europe, Western
84	Italy	EURO	A	B	C 10	Europe, Western
85	Jamaica	AMRO	B	K	C 04	Caribbean
86	Japan	WPRO	A	L	C 10	Asia Pacific, High Income
87	Jordan	EMRO	B	C	C 01	North Africa / Middle East
88	Kazakhstan	EURO	C	D	C 02	Asia, Central
89	Kenya	AFRO	E	I	C 13	Sub-Saharan Africa, East
90	Kiribati	WPRO	B	L	C 14	Oceania
91	Kuwait	EMRO	B	C	C 04	North Africa / Middle East
92	Kyrgyzstan	EURO	B	D	C 02	Asia, Central
93	Lao People's Democratic Republic	WPRO	B	G	C 09	Asia, South East
94	Latvia	EURO	C	F	C 10	Europe, Eastern
95	Lebanon	EMRO	B	B	C 06	North Africa / Middle East
96	Lesotho	AFRO	E	I	n/a	Sub-Saharan Africa, Southern
97	Liberia	AFRO	D	A	C 03	Sub-Saharan Africa, West
98	Libyan Arab Jamahiriya	EMRO	B	C	C 01	North Africa / Middle East
99	Lithuania	EURO	C	F	C 15	Europe, Eastern
100	Luxembourg	EURO	A	E	C 07	Europe, Western
101	Madagascar	AFRO	D	A	C 03	Sub-Saharan Africa, East
102	Malawi	AFRO	E	I	C 13	Sub-Saharan Africa, East
103	Malaysia	WPRO	B	G	C 05	Asia, South East
104	Maldives	SEARO	D	L	C 05	Asia, South East
105	Mali	AFRO	D	J	C 13	Sub-Saharan Africa, West
106	Malta	EURO	A	E	C 10	Europe, Western
107	Marshall Islands	WPRO	B	n/a	n/a	Oceania
108	Mauritania	AFRO	D	J	C 01	Sub-Saharan Africa, West
109	Mauritius	AFRO	D	A	C 05	Asia, South East
110	Mexico	AMRO	B	H	C 05	Latin America, Central
111	Micronesia (Federated States of)	WPRO	B	n/a	n/a	Oceania
112	Monaco	EURO	A	n/a	n/a	Europe, Western
113	Mongolia	WPRO	B	G	C 01	Asia, Central
114	Morocco	EMRO	D	C	C 01	North Africa / Middle East
115	Mozambique	AFRO	E	I	C 03	Sub-Saharan Africa, East
116	Myanmar	SEARO	D	G	C 09	Asia, South East
117	Namibia	AFRO	E	I	C 13	Sub-Saharan Africa, Southern
118	Nauru	WPRO	B	n/a	n/a	Oceania
119	Nepal	SEARO	D	G	C 09	Asia, South
120	Netherlands	EURO	A	E	C 11	Europe, Western
121	New Zealand	WPRO	A	M	C 10	Australasia
122	Nicaragua	AMRO	D	H	C 05	Latin America, Central
123	Niger	AFRO	D	J	C 13	Sub-Saharan Africa, West
124	Nigeria	AFRO	D	J	C 13	Sub-Saharan Africa, West
125	Niue	WPRO	B	n/a	n/a	Oceania
126	Norway	EURO	A	F	C 07	Europe, Western
127	Oman	EMRO	B	n/a	n/a	North Africa / Middle East
128	Pakistan	EMRO	D	G	C 01	Asia, South
129	Palau	WPRO	B	n/a	n/a	Oceania
130	Panama	AMRO	B	H	C 05	Latin America, Central
131	Papua New Guinea	WPRO	B	L	C 14	Oceania
132	Paraquay	AMRO	B	H	C 03	Latin America, Tropical
133	Peru	AMRO	D	H	C 05	Latin America, Andean
134	Philippines	WPRO	B	L	C 09	Asia, South East
135	Poland	EURO	B	E	C 08	Europe, Central
136	Portugal	EURO	A	B	C 15	Europe, Western
137	Qatar	EMRO	B	n/a	n/a	North Africa / Middle East
138	Republic of Korea	WPRO	B	L	C 10	Asia Pacific, High Income
139	Republic of Moldova	EURO	C	D	C 02	Europe, Eastern
140	Romania	EURO	B	D	C 15	Europe, Central
141	Russian Federation	EURO	C	D	C 10	Europe, Eastern
142	Rwanda	AFRO	E	A	C 16	Sub-Saharan Africa, East
143	Saint Kitts and Nevis	AMRO	B	H	C 04	Caribbean
144	Saint Lucia	AMRO	B	K	C 04	Caribbean
145	Saint Vincent and the Grenadines	AMRO	B	H	C 04	Caribbean
146	Samoa	WPRO	B	n/a	C 17	Oceania
147	San Marino	EURO	A	n/a	n/a	Europe, Western
148	Sao Tome and Principe	AFRO	D	A	C 17	Sub-Saharan Africa, West
149	Saudi Arabia	EMRO	B	C	C 04	North Africa / Middle East
150	Senegal	AFRO	D	J	C 13	Sub-Saharan Africa, West
151	Serbia	EURO	B	D	C 15	Europe, Central
151	Montenegro	EURO	B	D	C 15	Europe, Central
152	Seychelles	AFRO	D	A	C 05	Asia, South East
153	Sierra Leone	AFRO	D	A	C 09	Sub-Saharan Africa, West
154	Singapore	WPRO	A	n/a	n/a	Asia Pacific, High Income
155	Slovakia	EURO	B	E	C 15	Europe, Central
156	Slovenia	EURO	A	E	C 15	Europe, Central
157	Solomon Islands	WPRO	B	L	C 14	Oceania
158	Somalia	EMRO	D	A	C 13	Sub-Saharan Africa, East
159	South Africa	AFRO	E	I	C 05	Sub-Saharan Africa, Southern
160	Spain	EURO	A	B	C 08	Europe, Western
161	Sri Lanka	SEARO	B	G	C 14	Asia, South East
162	Sudan	EMRO	D	J	C 13	Sub-Saharan Africa, East
162	South Sudan	EMRO	D	J	C 13	Sub-Saharan Africa, East
163	Suriname	AMRO	B	K	C 05	Caribbean
164	Swaziland	AFRO	E	I	C 13	Sub-Saharan Africa, Southern
165	Sweden	EURO	A	F	C 15	Europe, Western
166	Switzerland	EURO	A	E	C 07	Europe, Western
167	Syrian Arab Republic	EMRO	B	C	C 01	North Africa / Middle East
168	Tajikistan	EURO	B	D	C 05	Asia, Central
169	Thailand	SEARO	B	G	C 09	Asia, South East
170	The Former Yugoslav Republic of Macedonia	EURO	B	D	C 05	Europe, Central
171	Timor-Leste	SEARO	D	n/a	C 09	Asia, South East
172	Togo	AFRO	D	I	C 03	Sub-Saharan Africa, West
173	Tonga	WPRO	B	n/a	n/a	Oceania
174	Trinidad and Tobago	AMRO	B	K	C 05	Caribbean
175	Tunisia	EMRO	B	C	C 01	North Africa / Middle East
176	Turkey	EURO	B	B	C 06	North Africa / Middle East
177	Turkmenistan	EURO	B	D	C 01	Asia, Central
178	Tuvalu	WPRO	B	n/a	n/a	Oceania
179	Uganda	AFRO	E	A	C 16	Sub-Saharan Africa, East
180	Ukraine	EURO	C	D	C 02	Europe, Eastern
181	United Arab Emirates	EMRO	B	B	C 04	North Africa / Middle East
182	United Kingdom	EURO	A	E	C 07	Europe, Western
183	United Republic of Tanzania	AFRO	E	I	C 13	Sub-Saharan Africa, East
184	United States of America	AMRO	A	M	C 10	North America, High Income
185	Uruguay	AMRO	B	M	C 07	Latin America, Southern
186	Uzbekistan	EURO	B	D	C 01	Asia, Central
187	Vanuatu	WPRO	B	L	C 14	Oceania
188	Venezuela (Bolivarian Republic of)	AMRO	B	K	C 05	Latin America, Central
189	Viet Nam	WPRO	B	G	C 09	Asia, South East
190	Yemen	EMRO	D	A	C 01	North Africa / Middle East
191	Zambia	AFRO	E	I	C 03	Sub-Saharan Africa, East
192	Zimbabwe	AFRO	E	I	C 13	Sub-Saharan Africa, Southern
		Age (Years) distribution
G1	Mean
	Mean
	-
	-
G2
	-
	-
	-
G3
	-
	-
	-
G4
	-
	-
	-
		Sex: male
G1	Mean
	Mean
	-
	-
G2
	-
	-
	-
G3
	-
	-
	-
G4
	-
	-
	-
	if applicable:	Duration in YEARS
G1	Min/Mode/Max		Min	Mode	Max	-	-	-
	None	-
		-
		-
		-
		-
		-
		-
		-
		-
		-
		-
G2			-	-	-	-	-	-
		-
		-
		-
		-
		-
		-
		-
		-
		-
		-
		-
G3			-	-	-	-	-	-
		-
		-
		-
		-
		-
		-
		-
		-
		-
		-
		-
G4			-	-	-	-	-	-
		-
		-
		-
		-
		-
		-
		-
		-
		-
		-
		-

## Sheet: PROB-global
	Node name:
	Parent node:
	Comments:
	Conditional probability				Distribution:	Percentiles
	0%	2.5%	5%	25%	50%	75%	95%	97.5%	100%	Age group	Sex group	Duration group	Comments
										G1	G1	G1
		Age group distribution
G1	Mean
	Mean
	-
	-
		Sex: male
G1	Mean
	Mean
	-
	-
	if applicable:	Duration in YEARS
G1	Min/Mode/Max		Min	Mode	Max	-	-	-
	None	-
		-
		-
		-
		-
		-
		-
		-
		-
		-
		-

## Sheet: PROB-local
	Node name:
	Parent node:
	Comments:
							Conditional probability					Distribution:	Percentiles
No	Country Name	WHO Region	WHO sub-Region	GEMS Region	GEMS (17) Region	GBD Region	0%	2.5%	5%	25%	50%	75%	95%	97.5%	100%	Age group	Sex group	Duration group	Comments
1	Afghanistan	EMRO	D	G	C 01	Asia, South
2	Albania	EURO	B	D	C 02	Europe, Central
3	Algeria	AFRO	D	C	C 01	North Africa / Middle East
4	Andorra	EURO	A	n/a	n/a	Europe, Western
5	Angola	AFRO	D	A	C 03	Sub-Saharan Africa, Central
6	Antigua and Barbuda	AMRO	B	K	C 04	Caribbean
7	Argentina	AMRO	B	M	C 05	Latin America, Southern
8	Armenia	EURO	B	D	C 06	Asia, Central
9	Australia	WPRO	A	M	C 07	Australasia
10	Austria	EURO	A	E	C 08	Europe, Western
11	Azerbaijan	EURO	B	D	C 01	Asia, Central
12	Bahamas	AMRO	B	K	C 04	Caribbean
13	Bahrain	EMRO	B	n/a	n/a	North Africa / Middle East
14	Bangladesh	SEARO	D	G	C 09	Asia, South
15	Barbados	AMRO	B	K	C 04	Caribbean
16	Belarus	EURO	C	D	C 10	Europe, Eastern
17	Belgium	EURO	A	E	C 11	Europe, Western
18	Belize	AMRO	B	K	C 12	Caribbean
19	Benin	AFRO	D	I	C 03	Sub-Saharan Africa, West
20	Bhutan	SEARO	D	n/a	n/a	Asia, South
21	Bolivia (Plurinational State of)	AMRO	D	H	C 05	Latin America, Andean
22	Bosnia and Herzegovina	EURO	B	D	C 02	Europe, Central
23	Botswana	AFRO	E	I	C 13	Sub-Saharan Africa, Southern
24	Brazil	AMRO	B	K	C 05	Latin America, Tropical
25	Brunei Darussalam	WPRO	A	L	C 04	Asia Pacific, High Income
26	Bulgaria	EURO	B	D	C 10	Europe, Central
27	Burkina Faso	AFRO	D	J	C 13	Sub-Saharan Africa, West
28	Burundi	AFRO	E	A	C 03	Sub-Saharan Africa, East
29	Cambodia	WPRO	B	G	C 09	Asia, South East
30	Cameroon	AFRO	D	A	C 03	Sub-Saharan Africa, West
31	Canada	AMRO	A	M	C 10	North America, High Income
32	Cape Verde	AFRO	D	I	C 05	Sub-Saharan Africa, West
33	Central African Republic	AFRO	E	A	C 13	Sub-Saharan Africa, Central
34	Chad	AFRO	D	J	C 13	Sub-Saharan Africa, West
35	Chile	AMRO	B	M	C 05	Latin America, Southern
36	China	WPRO	B	G	C 09	Asia, East
37	Colombia	AMRO	B	K	C 05	Latin America, Central
38	Comoros	AFRO	D	A	C 14	Sub-Saharan Africa, East
39	Congo	AFRO	E	J	C 03	Sub-Saharan Africa, Central
40	Cook Islands	WPRO	B	n/a	n/a	Oceania
41	Costa Rica	AMRO	B	K	C 05	Latin America, Central
42	Côte d'Ivoire	AFRO	E	A	C 03	Sub-Saharan Africa, West
43	Croatia	EURO	A	E	C 10	Europe, Central
44	Cuba	AMRO	A	K	C 06	Caribbean
45	Cyprus	EURO	A	B	C 10	Europe, Western
46	Czech Republic	EURO	A	E	C 15	Europe, Central
47	Democratic People's Republic of Korea	SEARO	D	L	C 09	Asia, East
48	Democratic Republic of the Congo	AFRO	E	J	C 03	Sub-Saharan Africa, Central
49	Denmark	EURO	A	E	C 15	Europe, Western
50	Djibouti	EMRO	D	A	C 05	Sub-Saharan Africa, East
51	Dominica	AMRO	B	K	C 12	Caribbean
52	Dominican Republic	AMRO	B	K	C 05	Caribbean
53	Ecuador	AMRO	D	K	C 05	Latin America, Andean
54	Egypt	EMRO	D	C	C 06	North Africa / Middle East
55	El Salvador	AMRO	B	H	C 05	Latin America, Central
56	Equatorial Guinea	AFRO	D	n/a	n/a	Sub-Saharan Africa, Central
57	Eritrea	AFRO	E	A	n/a	Sub-Saharan Africa, East
58	Estonia	EURO	C	F	C 10	Europe, Eastern
59	Ethiopia	AFRO	E	A	n/a	Sub-Saharan Africa, East
60	Fiji	WPRO	B	L	C 14	Oceania
61	Finland	EURO	A	F	C 07	Europe, Western
62	France	EURO	A	E	C 07	Europe, Western
63	Gabon	AFRO	D	A	C 16	Sub-Saharan Africa, Central
64	Gambia	AFRO	D	J	C 13	Sub-Saharan Africa, West
65	Georgia	EURO	B	D	C 02	Asia, Central
66	Germany	EURO	A	E	C 08	Europe, Western
67	Ghana	AFRO	D	I	C 03	Sub-Saharan Africa, West
68	Greece	EURO	A	B	C 06	Europe, Western
69	Grenada	AMRO	B	K	C 04	Caribbean
70	Guatemala	AMRO	D	H	C 05	Latin America, Central
71	Guinea	AFRO	D	A	C 03	Sub-Saharan Africa, West
72	Guinea-Bissau	AFRO	D	A	C 09	Sub-Saharan Africa, West
73	Guyana	AMRO	B	K	C 05	Caribbean
74	Haiti	AMRO	D	H	C 13	Caribbean
75	Honduras	AMRO	B	H	C 05	Latin America, Central
76	Hungary	EURO	C	E	C 15	Europe, Central
77	Iceland	EURO	A	F	C 07	Europe, Western
78	India	SEARO	D	G	C 05	Asia, South
79	Indonesia	SEARO	B	G	C 09	Asia, South East
80	Iran (Islamic Republic of)	EMRO	B	D	C 06	North Africa / Middle East
81	Iraq	EMRO	D	C	C 01	North Africa / Middle East
82	Ireland	EURO	A	E	C 15	Europe, Western
83	Israel	EURO	A	B	C 04	Europe, Western
84	Italy	EURO	A	B	C 10	Europe, Western
85	Jamaica	AMRO	B	K	C 04	Caribbean
86	Japan	WPRO	A	L	C 10	Asia Pacific, High Income
87	Jordan	EMRO	B	C	C 01	North Africa / Middle East
88	Kazakhstan	EURO	C	D	C 02	Asia, Central
89	Kenya	AFRO	E	I	C 13	Sub-Saharan Africa, East
90	Kiribati	WPRO	B	L	C 14	Oceania
91	Kuwait	EMRO	B	C	C 04	North Africa / Middle East
92	Kyrgyzstan	EURO	B	D	C 02	Asia, Central
93	Lao People's Democratic Republic	WPRO	B	G	C 09	Asia, South East
94	Latvia	EURO	C	F	C 10	Europe, Eastern
95	Lebanon	EMRO	B	B	C 06	North Africa / Middle East
96	Lesotho	AFRO	E	I	n/a	Sub-Saharan Africa, Southern
97	Liberia	AFRO	D	A	C 03	Sub-Saharan Africa, West
98	Libyan Arab Jamahiriya	EMRO	B	C	C 01	North Africa / Middle East
99	Lithuania	EURO	C	F	C 15	Europe, Eastern
100	Luxembourg	EURO	A	E	C 07	Europe, Western
101	Madagascar	AFRO	D	A	C 03	Sub-Saharan Africa, East
102	Malawi	AFRO	E	I	C 13	Sub-Saharan Africa, East
103	Malaysia	WPRO	B	G	C 05	Asia, South East
104	Maldives	SEARO	D	L	C 05	Asia, South East
105	Mali	AFRO	D	J	C 13	Sub-Saharan Africa, West
106	Malta	EURO	A	E	C 10	Europe, Western
107	Marshall Islands	WPRO	B	n/a	n/a	Oceania
108	Mauritania	AFRO	D	J	C 01	Sub-Saharan Africa, West
109	Mauritius	AFRO	D	A	C 05	Asia, South East
110	Mexico	AMRO	B	H	C 05	Latin America, Central
111	Micronesia (Federated States of)	WPRO	B	n/a	n/a	Oceania
112	Monaco	EURO	A	n/a	n/a	Europe, Western
113	Mongolia	WPRO	B	G	C 01	Asia, Central
114	Morocco	EMRO	D	C	C 01	North Africa / Middle East
115	Mozambique	AFRO	E	I	C 03	Sub-Saharan Africa, East
116	Myanmar	SEARO	D	G	C 09	Asia, South East
117	Namibia	AFRO	E	I	C 13	Sub-Saharan Africa, Southern
118	Nauru	WPRO	B	n/a	n/a	Oceania
119	Nepal	SEARO	D	G	C 09	Asia, South
120	Netherlands	EURO	A	E	C 11	Europe, Western
121	New Zealand	WPRO	A	M	C 10	Australasia
122	Nicaragua	AMRO	D	H	C 05	Latin America, Central
123	Niger	AFRO	D	J	C 13	Sub-Saharan Africa, West
124	Nigeria	AFRO	D	J	C 13	Sub-Saharan Africa, West
125	Niue	WPRO	B	n/a	n/a	Oceania
126	Norway	EURO	A	F	C 07	Europe, Western
127	Oman	EMRO	B	n/a	n/a	North Africa / Middle East
128	Pakistan	EMRO	D	G	C 01	Asia, South
129	Palau	WPRO	B	n/a	n/a	Oceania
130	Panama	AMRO	B	H	C 05	Latin America, Central
131	Papua New Guinea	WPRO	B	L	C 14	Oceania
132	Paraquay	AMRO	B	H	C 03	Latin America, Tropical
133	Peru	AMRO	D	H	C 05	Latin America, Andean
134	Philippines	WPRO	B	L	C 09	Asia, South East
135	Poland	EURO	B	E	C 08	Europe, Central
136	Portugal	EURO	A	B	C 15	Europe, Western
137	Qatar	EMRO	B	n/a	n/a	North Africa / Middle East
138	Republic of Korea	WPRO	B	L	C 10	Asia Pacific, High Income
139	Republic of Moldova	EURO	C	D	C 02	Europe, Eastern
140	Romania	EURO	B	D	C 15	Europe, Central
141	Russian Federation	EURO	C	D	C 10	Europe, Eastern
142	Rwanda	AFRO	E	A	C 16	Sub-Saharan Africa, East
143	Saint Kitts and Nevis	AMRO	B	H	C 04	Caribbean
144	Saint Lucia	AMRO	B	K	C 04	Caribbean
145	Saint Vincent and the Grenadines	AMRO	B	H	C 04	Caribbean
146	Samoa	WPRO	B	n/a	C 17	Oceania
147	San Marino	EURO	A	n/a	n/a	Europe, Western
148	Sao Tome and Principe	AFRO	D	A	C 17	Sub-Saharan Africa, West
149	Saudi Arabia	EMRO	B	C	C 04	North Africa / Middle East
150	Senegal	AFRO	D	J	C 13	Sub-Saharan Africa, West
151	Serbia	EURO	B	D	C 15	Europe, Central
151	Montenegro	EURO	B	D	C 15	Europe, Central
152	Seychelles	AFRO	D	A	C 05	Asia, South East
153	Sierra Leone	AFRO	D	A	C 09	Sub-Saharan Africa, West
154	Singapore	WPRO	A	n/a	n/a	Asia Pacific, High Income
155	Slovakia	EURO	B	E	C 15	Europe, Central
156	Slovenia	EURO	A	E	C 15	Europe, Central
157	Solomon Islands	WPRO	B	L	C 14	Oceania
158	Somalia	EMRO	D	A	C 13	Sub-Saharan Africa, East
159	South Africa	AFRO	E	I	C 05	Sub-Saharan Africa, Southern
160	Spain	EURO	A	B	C 08	Europe, Western
161	Sri Lanka	SEARO	B	G	C 14	Asia, South East
162	Sudan	EMRO	D	J	C 13	Sub-Saharan Africa, East
162	South Sudan	EMRO	D	J	C 13	Sub-Saharan Africa, East
163	Suriname	AMRO	B	K	C 05	Caribbean
164	Swaziland	AFRO	E	I	C 13	Sub-Saharan Africa, Southern
165	Sweden	EURO	A	F	C 15	Europe, Western
166	Switzerland	EURO	A	E	C 07	Europe, Western
167	Syrian Arab Republic	EMRO	B	C	C 01	North Africa / Middle East
168	Tajikistan	EURO	B	D	C 05	Asia, Central
169	Thailand	SEARO	B	G	C 09	Asia, South East
170	The Former Yugoslav Republic of Macedonia	EURO	B	D	C 05	Europe, Central
171	Timor-Leste	SEARO	D	n/a	C 09	Asia, South East
172	Togo	AFRO	D	I	C 03	Sub-Saharan Africa, West
173	Tonga	WPRO	B	n/a	n/a	Oceania
174	Trinidad and Tobago	AMRO	B	K	C 05	Caribbean
175	Tunisia	EMRO	B	C	C 01	North Africa / Middle East
176	Turkey	EURO	B	B	C 06	North Africa / Middle East
177	Turkmenistan	EURO	B	D	C 01	Asia, Central
178	Tuvalu	WPRO	B	n/a	n/a	Oceania
179	Uganda	AFRO	E	A	C 16	Sub-Saharan Africa, East
180	Ukraine	EURO	C	D	C 02	Europe, Eastern
181	United Arab Emirates	EMRO	B	B	C 04	North Africa / Middle East
182	United Kingdom	EURO	A	E	C 07	Europe, Western
183	United Republic of Tanzania	AFRO	E	I	C 13	Sub-Saharan Africa, East
184	United States of America	AMRO	A	M	C 10	North America, High Income
185	Uruguay	AMRO	B	M	C 07	Latin America, Southern
186	Uzbekistan	EURO	B	D	C 01	Asia, Central
187	Vanuatu	WPRO	B	L	C 14	Oceania
188	Venezuela (Bolivarian Republic of)	AMRO	B	K	C 05	Latin America, Central
189	Viet Nam	WPRO	B	G	C 09	Asia, South East
190	Yemen	EMRO	D	A	C 01	North Africa / Middle East
191	Zambia	AFRO	E	I	C 03	Sub-Saharan Africa, East
192	Zimbabwe	AFRO	E	I	C 13	Sub-Saharan Africa, Southern
		Age (Years) distribution
G1	Mean
	Mean
	-
	-
G2
	-
	-
	-
G3
	-
	-
	-
G4
	-
	-
	-
		Sex: male
G1	Mean
	Mean
	-
	-
G2
	-
	-
	-
G3
	-
	-
	-
G4
	-
	-
	-
	if applicable:	Duration in YEARS
G1	Min/Mode/Max		Min	Mode	Max	-	-	-
	None	-
		-
		-
		-
		-
		-
		-
		-
		-
		-
		-
G2			-	-	-	-	-	-
		-
		-
		-
		-
		-
		-
		-
		-
		-
		-
		-
G3			-	-	-	-	-	-
		-
		-
		-
		-
		-
		-
		-
		-
		-
		-
		-
G4			-	-	-	-	-	-
		-
		-
		-
		-
		-
		-
		-
		-
		-
		-
		-
