# Supplementary material for: Methodological Framework for World Health Organization Estimates of the Global Burden of Foodborne Disease
Source: PLoS One. 2015 Dec 3;10(12):e0142498. doi: 10.1371/journal.pone.0142498 (PMC4668830; doi:10.1371/journal.pone.0142498)
Supplement: S3 Table — (XLSX) [file pone.0142498.s007.xlsx]

## Sheet: S3 Table
S3 Table. Availability of data for estimating the global and regional burden of foodborne disease
COUNTRY	SUBREGION	Brucella spp.	Listeria monocytogenes	Toxoplasma gondii, congenital	Toxoplasma gondii, acquired	Echinococcus granulosus	Echinococcus multilocularis	Ascaris spp.	Chlonorchis sinensis	Fasciola spp.	Intestinal flukes	Opisthorchis spp.	Paragonimus spp.	Dioxin	Aflatoxin	Number of hazards for which no data were available
Afghanistan	EMR D	Data	No data	No data	No data	No data	Data	Data	Data	Data	Data	Data	Data	No data	No data	6
Albania	EUR B	Data	No data	Data	Data	Data	No data	Data	Data	Data	Data	Data	Data	No data	Data	3
Algeria	AFR D	Data	No data	No data	No data	Data	Data	Data	Data	No data	Data	Data	Data	No data	No data	6
Andorra	EUR A	No data	Data	No data	No data	No data	Data	Data	Data	Data	Data	Data	Data	No data	Data	5
Angola	AFR D	No data	No data	No data	No data	No data	Data	Data	Data	Data	Data	Data	Data	No data	No data	7
Antigua and Barbuda	AMR B	No data	No data	No data	No data	Disease free	Data	No data	Data	Data	Data	Data	Data	Data	No data	6
Argentina	AMR B	Data	No data	No data	Data	Data	Data	Data	Data	No data	Data	Data	Data	No data	Data	4
Armenia	EUR B	Data	No data	No data	No data	Data	No data	No data	Data	Data	Data	Data	Data	No data	No data	7
Australia	WPR A	Disease free	Data	Data	Data	Data	Data	Data	Data	No data	No data	Data	Data	Data	Data	2
Austria	EUR A	Disease free	Data	Data	Data	Data	Data	Data	Data	No data	Data	Data	Data	No data	Data	2
Azerbaijan	EUR B	Data	No data	No data	No data	Data	No data	Data	Data	Data	Data	Data	Data	No data	No data	6
Bahamas	AMR B	No data	No data	No data	No data	Disease free	Data	No data	Data	Data	Data	Data	Data	No data	No data	7
Bahrain	EMR B	No data	No data	Data	Data	Data	Data	No data	Data	Data	Data	Data	Data	No data	No data	5
Bangladesh	SEAR D	No data	No data	No data	No data	No data	Data	Data	Data	Data	No data	Data	Data	No data	No data	8
Barbados	AMR B	No data	No data	No data	No data	Disease free	Data	No data	Data	Data	Data	Data	Data	No data	No data	7
Belarus	EUR C	Disease free	Data	Data	Data	Data	No data	Data	Data	Data	Data	No data	Data	No data	Data	3
Belgium	EUR A	Disease free	Data	Data	No data	No data	Data	Data	Data	No data	Data	Data	Data	Data	Data	3
Belize	AMR B	Disease free	No data	No data	No data	No data	Data	Data	Data	Data	Data	Data	Data	No data	No data	6
Benin	AFR D	No data	No data	Data	Data	No data	Data	Data	Data	Data	Data	Data	No data	No data	No data	6
Bhutan	SEAR D	No data	No data	No data	No data	No data	No data	Data	Data	Data	Data	Data	Data	No data	No data	8
Bolivia (Plurinational State of)	AMR D	No data	No data	Data	Data	No data	Data	Data	Data	Data	Data	Data	Data	No data	No data	5
Bosnia and Herzegovina	EUR B	Data	Data	No data	No data	Data	No data	Data	Data	Data	Data	Data	Data	No data	Data	4
Botswana	AFR E	No data	No data	Data	No data	Data	Data	Data	Data	Data	Data	Data	Data	No data	No data	5
Brazil	AMR B	No data	No data	Data	Data	Data	Data	Data	Data	No data	No data	Data	No data	Data	Data	5
Brunei Darussalam	WPR A	Disease free	No data	No data	No data	Data	Data	Data	Data	Data	Data	Data	Data	No data	No data	5
Bulgaria	EUR B	No data	Data	Data	No data	Data	No data	Data	Data	No data	Data	Data	Data	Data	Data	4
Burkina Faso	AFR D	No data	No data	Data	Data	No data	Data	Data	Data	Data	Data	Data	No data	No data	No data	6
Burundi	AFR E	No data	No data	No data	Data	No data	Data	Data	Data	Data	Data	Data	Data	No data	No data	6
Cambodia	WPR B	No data	No data	No data	No data	Data	Data	Data	Data	No data	No data	No data	No data	No data	No data	10
Cameroon	AFR D	No data	No data	Data	Data	No data	Data	Data	Data	No data	Data	Data	No data	No data	No data	7
Canada	AMR A	Data	Data	Data	No data	Data	Data	Data	Data	No data	No data	Data	No data	No data	Data	5
Cape Verde	AFR D	No data	No data	No data	No data	Disease free	Data	No data	Data	No data	Data	Data	Data	No data	No data	8
Central African Republic	AFR E	No data	No data	Data	Data	No data	Data	Data	Data	Data	Data	Data	No data	No data	No data	6
Chad	AFR D	Data	No data	No data	No data	No data	Data	Data	Data	Data	Data	Data	Data	No data	No data	6
Chile	AMR B	Data	Data	Data	Data	Data	Data	Data	Data	No data	Data	Data	Data	Data	No data	2
China	WPR B	Data	Data	Data	Data	Data	Data	Data	Data	Data	Data	Data	Data	No data	Data	1
Colombia	AMR B	Data	No data	Data	Data	No data	Data	Data	Data	No data	Data	Data	No data	No data	No data	6
Comoros	AFR D	No data	No data	No data	No data	Disease free	Data	Data	Data	Data	Data	Data	Data	No data	No data	6
Congo	AFR E	No data	No data	Data	Data	No data	Data	Data	Data	Data	Data	Data	Data	Data	No data	4
Cook Islands	WPR B	No data	No data	No data	No data	Disease free	Data	No data	Data	Data	Data	Data	Data	No data	No data	7
Costa Rica	AMR B	No data	No data	Data	Data	No data	Data	Data	Data	No data	Data	Data	No data	No data	No data	7
Côte d'Ivoire	AFR E	No data	No data	Data	Data	No data	Data	Data	Data	No data	Data	Data	No data	Data	No data	6
Croatia	EUR A	No data	No data	Data	Data	Data	No data	Data	Data	No data	Data	Data	Data	Data	Data	4
Cuba	AMR A	No data	No data	Data	Data	Disease free	Data	Data	Data	No data	Data	Data	No data	No data	No data	6
Cyprus	EUR A	No data	No data	No data	No data	Data	Data	Data	Data	Data	Data	Data	Data	Data	Data	4
Czech Republic	EUR A	Disease free	Data	Data	Data	Data	No data	Data	Data	Data	Data	Data	Data	Data	Data	1
Democratic People's Republic of Korea	SEAR D	No data	No data	No data	No data	No data	Data	Data	Data	Data	Data	Data	Data	No data	No data	7
Democratic Republic of the Congo	AFR E	No data	No data	Data	Data	No data	Data	Data	Data	Data	Data	Data	No data	No data	Data	5
Denmark	EUR A	Disease free	Data	Data	Data	Data	Data	Data	Data	Data	Data	Data	Data	No data	Data	1
Djibouti	EMR D	Disease free	No data	No data	No data	No data	Data	Data	Data	Data	Data	Data	Data	No data	No data	6
Dominica	AMR B	No data	No data	No data	No data	Disease free	Data	No data	Data	Data	Data	Data	Data	No data	No data	7
Dominican Republic	AMR B	No data	No data	No data	No data	No data	Data	No data	Data	No data	Data	Data	Data	No data	No data	9
Ecuador	AMR D	No data	No data	No data	No data	No data	Data	Data	Data	Data	Data	Data	Data	No data	No data	7
Egypt	EMR D	Data	No data	Data	Data	Data	Data	Data	Data	Data	Data	Data	Data	Data	Data	1
El Salvador	AMR B	No data	No data	No data	No data	No data	Data	Data	Data	No data	Data	Data	No data	No data	No data	9
Equatorial Guinea	AFR D	No data	No data	No data	Data	No data	Data	Data	Data	No data	No data	Data	No data	No data	No data	9
Eritrea	AFR E	Data	No data	No data	No data	No data	Data	Data	Data	Data	Data	Data	Data	No data	No data	6
Estonia	EUR C	No data	Data	Data	Data	No data	No data	Data	Data	Data	Data	Data	Data	No data	Data	4
Ethiopia	AFR E	No data	No data	Data	Data	Data	Data	Data	Data	No data	Data	Data	Data	No data	Data	4
Fiji	WPR B	No data	No data	Data	No data	Disease free	Data	Data	Data	Data	Data	Data	Data	Data	No data	4
Finland	EUR A	Disease free	Data	Data	No data	Data	Data	Data	Data	Data	Data	Data	Data	Data	Data	1
France	EUR A	Data	Data	Data	Data	Data	Data	Data	Data	No data	Data	Data	Data	Data	Data	1
Gabon	AFR D	No data	No data	Data	No data	No data	Data	Data	Data	Data	Data	Data	No data	No data	No data	7
Gambia	AFR D	No data	No data	Data	No data	No data	Data	Data	Data	Data	Data	Data	Data	No data	Data	5
Georgia	EUR B	Data	Data	No data	No data	No data	No data	Data	Data	No data	Data	Data	Data	No data	No data	7
Germany	EUR A	Disease free	Data	Data	Data	Data	Data	Data	Data	No data	Data	No data	Data	Data	Data	2
Ghana	AFR D	No data	No data	Data	Data	No data	Data	Data	Data	Data	Data	Data	Data	Data	No data	4
Greece	EUR A	Data	Data	Data	Data	Data	Data	Data	Data	No data	No data	Data	Data	No data	Data	3
Grenada	AMR B	No data	No data	Data	Data	Disease free	Data	Data	Data	Data	Data	Data	Data	No data	No data	4
Guatemala	AMR D	Data	No data	No data	No data	No data	Data	Data	Data	No data	Data	Data	No data	No data	No data	8
Guinea	AFR D	No data	No data	No data	No data	No data	Data	Data	Data	Data	Data	Data	No data	No data	No data	8
Guinea-Bissau	AFR D	No data	No data	No data	No data	No data	Data	Data	Data	Data	Data	Data	Data	No data	No data	7
Guyana	AMR B	No data	No data	Data	No data	No data	Data	Data	Data	Data	No data	Data	Data	No data	No data	7
Haiti	AMR D	No data	No data	No data	No data	No data	Data	Data	Data	No data	Data	Data	Data	Data	No data	7
Honduras	AMR B	No data	No data	Data	No data	No data	Data	Data	Data	Data	Data	Data	No data	No data	No data	7
Hungary	EUR C	No data	Data	Data	Data	Data	Data	Data	Data	No data	No data	Data	Data	Data	Data	3
Iceland	EUR A	Disease free	Data	Data	Data	Disease free	Data	Data	Data	Data	Data	Data	Data	No data	Data	1
India	SEAR D	No data	No data	Data	Data	Data	No data	Data	No data	No data	No data	No data	No data	Data	Data	8
Indonesia	SEAR B	No data	No data	Data	Data	Data	Data	Data	Data	Data	No data	Data	No data	No data	Data	5
Iran (Islamic Republic of)	EMR B	Data	No data	Data	Data	Data	Data	Data	Data	Data	No data	Data	Data	No data	Data	3
Iraq	EMR D	Data	No data	Data	Data	No data	Data	Data	Data	No data	Data	Data	Data	No data	No data	5
Ireland	EUR A	Data	Data	Data	Data	Data	Data	Data	Data	No data	Data	Data	Data	Data	Data	1
Israel	EUR A	No data	Data	Data	Data	Data	Data	Data	Data	No data	No data	Data	Data	No data	Data	4
Italy	EUR A	Data	Data	Data	Data	Data	Data	Data	Data	No data	No data	No data	Data	Data	Data	3
Jamaica	AMR B	Disease free	No data	Data	Data	Disease free	Data	Data	Data	Data	Data	Data	Data	No data	No data	3
Japan	WPR A	No data	Data	Data	Data	No data	Data	Data	No data	No data	Data	Data	No data	No data	No data	7
Jordan	EMR B	Data	No data	Data	Data	Data	Data	Data	Data	Data	Data	Data	Data	No data	No data	3
Kazakhstan	EUR C	Data	No data	Data	Data	Data	No data	Data	Data	Data	No data	Data	Data	No data	No data	5
Kenya	AFR E	No data	No data	Data	No data	Data	Data	Data	Data	Data	Data	Data	Data	Data	Data	3
Kiribati	WPR B	No data	No data	No data	No data	Disease free	Data	No data	Data	Data	Data	Data	Data	Data	No data	6
Kuwait	EMR B	Data	No data	No data	No data	Data	Data	Data	Data	Data	Data	Data	Data	No data	No data	5
Kyrgyzstan	EUR B	Data	Data	Data	Data	Data	Data	Data	Data	No data	Data	Data	Data	No data	No data	3
Lao People's Democratic Republic	WPR B	No data	No data	Data	No data	No data	Data	Data	Data	No data	No data	Data	Data	No data	No data	8
Latvia	EUR C	No data	Data	No data	No data	Data	No data	Data	Data	Data	Data	Data	Data	No data	Data	5
Lebanon	EMR B	Data	No data	Data	Data	Data	Data	No data	Data	No data	Data	Data	Data	No data	No data	5
Lesotho	AFR E	Disease free	No data	No data	No data	No data	Data	Data	Data	Data	Data	Data	Data	No data	No data	6
Liberia	AFR D	No data	No data	No data	No data	No data	Data	Data	Data	Data	Data	Data	No data	No data	No data	8
Libyan Arab Jamahiriya	EMR B	No data	No data	Data	No data	Data	Data	Data	Data	Data	Data	Data	Data	No data	No data	5
Lithuania	EUR C	No data	Data	No data	No data	Data	Data	Data	Data	Data	Data	Data	Data	Data	Data	3
Luxembourg	EUR A	Disease free	Data	No data	No data	Data	Data	Data	Data	Data	Data	Data	Data	Data	Data	2
Madagascar	AFR D	Disease free	No data	Data	Data	Disease free	Data	Data	Data	No data	Data	Data	Data	No data	No data	4
Malawi	AFR E	No data	No data	Data	Data	No data	Data	Data	Data	Data	Data	Data	Data	No data	No data	5
Malaysia	WPR B	No data	No data	Data	Data	Data	Data	Data	Data	No data	No data	Data	No data	No data	Data	6
Maldives	SEAR D	Disease free	No data	No data	No data	Disease free	Data	No data	Data	Data	Data	Data	Data	No data	No data	6
Mali	AFR D	Data	No data	Data	Data	No data	Data	Data	Data	No data	Data	Data	Data	Data	No data	4
Malta	EUR A	No data	Data	No data	No data	Disease free	Data	Data	Data	Data	Data	Data	Data	No data	Data	4
Marshall Islands	WPR B	No data	No data	Data	No data	Disease free	Data	Data	Data	Data	Data	Data	Data	No data	No data	5
Mauritania	AFR D	No data	No data	Data	Data	Data	Data	Data	Data	Data	Data	Data	Data	No data	No data	4
Mauritius	AFR D	Disease free	No data	No data	No data	Disease free	Data	No data	Data	Data	Data	Data	Data	Data	No data	5
Mexico	AMR B	Data	No data	Data	Data	No data	Data	Data	Data	No data	Data	Data	No data	No data	Data	5
Micronesia (Federated States of)	WPR B	No data	No data	No data	No data	Disease free	Data	Data	Data	Data	Data	Data	Data	No data	No data	6
Monaco	EUR A	No data	No data	No data	No data	Data	Data	Data	Data	Data	Data	Data	Data	No data	Data	5
Mongolia	WPR B	Data	No data	No data	No data	Data	Data	No data	Data	Data	Data	Data	Data	No data	No data	6
Morocco	EMR D	No data	No data	Data	Data	Data	Data	Data	Data	No data	Data	Data	Data	No data	No data	5
Mozambique	AFR E	No data	No data	Data	Data	No data	Data	Data	Data	No data	Data	Data	Data	No data	Data	5
Myanmar	SEAR D	No data	No data	No data	No data	No data	Data	Data	Data	Data	No data	Data	No data	No data	No data	9
Namibia	AFR E	Data	No data	Data	Data	No data	Data	Data	Data	Data	Data	Data	Data	No data	No data	4
Nauru	WPR B	No data	No data	No data	No data	Disease free	Data	No data	Data	Data	Data	Data	Data	No data	No data	7
Nepal	SEAR D	No data	No data	Data	Data	Data	No data	Data	Data	No data	Data	Data	No data	No data	No data	7
Netherlands	EUR A	Disease free	Data	Data	Data	Data	Data	Data	Data	No data	Data	Data	Data	Data	Data	1
New Zealand	WPR A	Disease free	Data	Data	Data	Data	Data	Data	Data	Data	No data	Data	Data	Data	No data	2
Nicaragua	AMR D	No data	No data	No data	No data	Data	Data	Data	Data	Data	Data	Data	No data	No data	No data	7
Niger	AFR D	No data	No data	Data	Data	No data	Data	Data	Data	No data	Data	Data	Data	No data	No data	6
Nigeria	AFR D	No data	No data	Data	Data	No data	Data	Data	Data	No data	No data	Data	No data	Data	Data	6
Niue	WPR B	No data	No data	No data	No data	Disease free	Data	No data	Data	Data	Data	Data	Data	No data	No data	7
Norway	EUR A	Disease free	Data	Data	No data	Data	Data	Data	Data	Data	Data	Data	Data	Data	Data	1
Oman	EMR B	Data	No data	No data	No data	No data	Data	Data	Data	Data	Data	Data	Data	No data	No data	6
Pakistan	EMR D	No data	No data	Data	Data	No data	No data	Data	Data	Data	No data	Data	No data	No data	Data	7
Palau	WPR B	No data	No data	No data	No data	Disease free	Data	No data	Data	Data	Data	Data	Data	No data	No data	7
Panama	AMR B	Data	No data	Data	Data	No data	Data	Data	Data	Data	Data	Data	No data	No data	No data	5
Papua New Guinea	WPR B	No data	No data	Data	Data	Data	Data	Data	Data	Data	Data	Data	No data	No data	No data	5
Paraguay	AMR B	No data	No data	No data	No data	No data	Data	Data	Data	Data	Data	Data	Data	No data	No data	7
Peru	AMR D	Data	No data	Data	No data	Data	Data	Data	Data	Data	Data	Data	Data	No data	No data	4
Philippines	WPR B	No data	No data	Data	Data	Data	Data	Data	No data	No data	Data	No data	No data	Data	Data	6
Poland	EUR B	No data	Data	Data	Data	Data	Data	Data	Data	No data	Data	No data	Data	No data	Data	4
Portugal	EUR A	Data	Data	Data	Data	Data	Data	Data	Data	Data	Data	Data	Data	No data	Data	1
Qatar	EMR B	No data	No data	Data	Data	No data	Data	Data	Data	Data	Data	Data	Data	No data	No data	5
Republic of Korea	WPR B	Data	No data	Data	Data	Data	Data	Data	Data	No data	Data	Data	Data	Data	Data	2
Republic of Moldova	EUR C	Disease free	No data	No data	No data	Data	No data	Data	Data	Data	Data	Data	Data	Data	Data	4
Romania	EUR B	No data	Data	Data	Data	Data	No data	Data	Data	No data	No data	No data	Data	Data	Data	5
Russian Federation	EUR C	Data	Data	Data	Data	Data	Data	Data	Data	No data	Data	Data	No data	Data	Data	2
Rwanda	AFR E	No data	No data	Data	Data	No data	Data	Data	Data	Data	Data	Data	Data	No data	No data	5
Saint Kitts and Nevis	AMR B	No data	No data	No data	No data	Disease free	Data	No data	Data	Data	Data	Data	Data	No data	No data	7
Saint Lucia	AMR B	No data	No data	No data	No data	Disease free	Data	Data	Data	Data	Data	Data	Data	No data	No data	6
Saint Vincent and the Grenadines	AMR B	No data	No data	No data	No data	Disease free	Data	Data	Data	Data	Data	Data	Data	No data	No data	6
Samoa	WPR B	Disease free	No data	No data	No data	Disease free	Data	No data	Data	Data	Data	Data	Data	No data	No data	6
San Marino	EUR A	Disease free	No data	No data	No data	No data	Data	Data	Data	Data	Data	Data	Data	No data	Data	5
Sao Tome and Principe	AFR D	No data	No data	Data	Data	Disease free	Data	Data	Data	Data	Data	Data	Data	No data	No data	4
Saudi Arabia	EMR B	Data	No data	Data	Data	No data	Data	Data	Data	No data	Data	Data	Data	No data	No data	5
Senegal	AFR D	No data	No data	Data	Data	No data	Data	Data	Data	Data	Data	Data	Data	Data	No data	4
Serbia	EUR B	Data	No data	Data	Data	Data	No data	Data	Data	Data	Data	Data	Data	No data	Data	3
Montenegro	EUR B	Data	No data	Data	Data	Data	No data	Data	Data	Data	Data	Data	Data	No data	Data	3
Seychelles	AFR D	No data	No data	No data	No data	Disease free	Data	Data	Data	Data	Data	Data	Data	No data	No data	6
Sierra Leone	AFR D	No data	No data	No data	No data	No data	Data	Data	Data	Data	Data	Data	No data	No data	No data	8
Singapore	WPR A	Disease free	Data	Data	Data	Data	Data	Data	No data	No data	No data	Data	Data	No data	No data	5
Slovakia	EUR B	Disease free	Data	Data	Data	Data	Data	Data	Data	No data	Data	Data	Data	Data	Data	1
Slovenia	EUR A	No data	Data	Data	Data	Data	Data	Data	Data	Data	Data	Data	Data	No data	Data	2
Solomon Islands	WPR B	No data	No data	No data	No data	Disease free	Data	Data	Data	Data	Data	Data	Data	No data	No data	6
Somalia	EMR D	No data	No data	Data	Data	No data	Data	Data	Data	Data	Data	Data	Data	No data	No data	5
South Africa	AFR E	No data	No data	Data	No data	No data	Data	Data	Data	Data	Data	Data	Data	No data	Data	5
Spain	EUR A	Data	Data	Data	Data	Data	Data	Data	Data	Data	No data	Data	Data	Data	Data	1
Sri Lanka	SEAR B	No data	No data	Data	Data	No data	Data	Data	Data	Data	Data	Data	No data	No data	No data	6
Sudan	EMR D	No data	No data	Data	Data	No data	Data	Data	Data	Data	No data	Data	Data	Data	Data	4
South Sudan	EMR D	No data	No data	Data	Data	No data	Data	Data	Data	Data	No data	Data	Data	Data	Data	4
Suriname	AMR B	Disease free	No data	No data	No data	Data	Data	Data	Data	Data	Data	Data	Data	No data	No data	5
Swaziland	AFR E	No data	No data	Data	Data	No data	Data	Data	Data	Data	Data	Data	Data	No data	No data	5
Sweden	EUR A	Disease free	Data	Data	Data	Data	Data	Data	Data	No data	Data	Data	Data	Data	Data	1
Switzerland	EUR A	Disease free	Data	Data	Data	Data	Data	Data	Data	No data	Data	Data	Data	Data	Data	1
Syrian Arab Republic	EMR B	Data	No data	No data	Data	No data	Data	Data	Data	No data	Data	Data	Data	Data	No data	5
Tajikistan	EUR B	Data	No data	No data	No data	Data	No data	Data	Data	No data	Data	Data	Data	Data	No data	6
Thailand	SEAR B	No data	No data	Data	Data	Data	Data	Data	No data	No data	Data	Data	No data	No data	Data	6
The Former Yugoslav Republic of Macedonia	EUR B	No data	No data	Data	No data	Data	Data	Data	Data	Data	Data	Data	Data	No data	Data	4
Timor-Leste	SEAR D	No data	No data	No data	No data	Data	Data	Data	Data	Data	Data	Data	Data	No data	No data	6
Togo	AFR D	No data	No data	Data	Data	No data	Data	Data	Data	Data	Data	Data	Data	No data	No data	5
Tonga	WPR B	No data	No data	No data	No data	Disease free	Data	Data	Data	Data	Data	Data	Data	Data	No data	5
Trinidad and Tobago	AMR B	No data	No data	Data	Data	Disease free	Data	Data	Data	Data	Data	Data	Data	No data	No data	4
Tunisia	EMR B	Data	No data	Data	Data	Data	Data	Data	Data	No data	No data	Data	Data	No data	No data	5
Turkey	EUR B	Data	Data	Data	Data	Data	Data	Data	Data	No data	No data	Data	Data	No data	Data	3
Turkmenistan	EUR B	Data	No data	No data	No data	Data	No data	Data	Data	Data	Data	Data	Data	No data	No data	6
Tuvalu	WPR B	No data	No data	No data	No data	Disease free	Data	No data	Data	Data	Data	Data	Data	No data	No data	7
Uganda	AFR E	Data	No data	Data	Data	No data	Data	Data	Data	No data	Data	Data	Data	Data	No data	4
Ukraine	EUR C	Disease free	No data	Data	No data	Data	No data	Data	Data	Data	Data	Data	Data	Data	Data	3
United Arab Emirates	EMR B	Disease free	No data	Data	Data	No data	Data	Data	Data	Data	Data	Data	Data	No data	No data	4
United Kingdom	EUR A	Data	Data	Data	Data	Data	Data	Data	Data	No data	Data	Data	Data	No data	Data	2
United Republic of Tanzania	AFR E	No data	No data	Data	Data	Data	Data	Data	Data	Data	Data	Data	Data	No data	Data	3
United States of America	AMR A	Data	Data	Data	Data	Data	Data	Data	Data	No data	No data	Data	No data	Data	Data	3
Uruguay	AMR B	No data	No data	Data	No data	Data	Data	Data	Data	No data	Data	Data	Data	Data	No data	5
Uzbekistan	EUR B	Data	No data	No data	No data	Data	No data	Data	Data	No data	Data	Data	Data	No data	No data	7
Vanuatu	WPR B	Disease free	No data	No data	No data	Disease free	Data	Data	Data	Data	Data	Data	Data	No data	No data	5
Venezuela (Bolivarian Republic of)	AMR B	No data	No data	Data	Data	No data	Data	Data	Data	No data	No data	Data	No data	No data	No data	8
Viet Nam	WPR B	No data	No data	Data	Data	Data	Data	Data	Data	Data	No data	No data	No data	No data	No data	7
Yemen	EMR D	No data	No data	Data	No data	Data	Data	Data	Data	No data	Data	Data	Data	No data	No data	6
Zambia	AFR E	No data	No data	Data	Data	Data	Data	Data	Data	Data	Data	Data	No data	No data	No data	5
Zimbabwe	AFR E	No data	No data	No data	Data	No data	Data	Data	Data	No data	Data	Data	Data	No data	Data	6
Number of countries without data		112	149	74	90	72	24	20	5	70	31	9	40	143	122
Number of countries with data		50	45	120	104	89	170	174	189	124	163	185	154	51	72
Number of countries considered disease free		32	0	0	0	33	0	0	0	0	0	0	0	0	0
