# Supplementary material for: Methodological Framework for World Health Organization Estimates of the Global Burden of Foodborne Disease
Source: PLOS journal article supplement (doi:10.1371/journal.pone.0142498), 2015-12-03
Supplement: S6 (10.1371/journal.pone.0142498.s006) [file journal.pone.0142498.s006]

**S2 Table. FERG hazards, causally related health states and corresponding disability weights (DWs).** The fourth column describes how the various DWs were derived. The source for the DWs is the Global Burden of Disease 2010 Study, unless stated otherwise.

| Hazard                               | Health state              | DW    | Mapping                                                                                                                                                    |
|--------------------------------------|---------------------------|-------|------------------------------------------------------------------------------------------------------------------------------------------------------------|
| <i>Diarrheal hazards</i>             |                           |       |                                                                                                                                                            |
| Norovirus                            | Diarrheal disease         | 0.074 | <b>Weighted average</b> of 91% <i>Diarrhoea: mild</i> (DW=0.061); 8.5% <i>Diarrhoea: moderate</i> (DW=0.202); and 0.5% <i>Diarrhoea: severe</i> (DW=0.281) |
| <i>Campylobacter</i> spp.            | Diarrheal disease         | 0.101 | <b>Weighted average</b> of 73% <i>Diarrhoea: mild</i> (DW=0.061); 25% <i>Diarrhoea: moderate</i> (DW=0.202); and 2% <i>Diarrhoea: severe</i> (DW=0.281)    |
|                                      | Guillain-Barré syndrome   | 0.445 | <b>Proxy health state</b> of <i>Multiple sclerosis: moderate</i>                                                                                           |
| Enteropathogenic <i>E. coli</i>      | Diarrheal disease         | 0.074 | <b>Weighted average</b> of 91% <i>Diarrhoea: mild</i> (DW=0.061); 8.5% <i>Diarrhoea: moderate</i> (DW=0.202); and 0.5% <i>Diarrhoea: severe</i> (DW=0.281) |
| Enterotoxigenic <i>E. coli</i>       | Diarrheal disease         | 0.074 | <b>Weighted average</b> of 91% <i>Diarrhoea: mild</i> (DW=0.061); 8.5% <i>Diarrhoea: moderate</i> (DW=0.202); and 0.5% <i>Diarrhoea: severe</i> (DW=0.281) |
| Shiga toxin-producing <i>E. coli</i> | Diarrheal disease         | 0.091 | <b>Weighted average</b> of 80% <i>Diarrhoea: mild</i> (DW=0.061); 18% <i>Diarrhoea: moderate</i> (DW=0.202); and 2% <i>Diarrhoea: severe</i> (DW=0.281)    |
|                                      | Hemolytic uremic syndrome | 0.210 | <b>Proxy health state</b> of <i>Infectious disease: acute episode, severe</i>                                                                              |
|                                      | End-stage renal disease   | 0.573 | <b>Mapped health state</b> of <i>End-stage renal disease: on dialysis</i>                                                                                  |
| Non-typhoidal <i>S. enterica</i>     | Diarrheal disease         | 0.101 | <b>Weighted average</b> of 73 % <i>Diarrhoea: mild</i> (DW=0.061); 25% <i>Diarrhoea: moderate</i> (DW=0.202); and 2% <i>Diarrhoea: severe</i> (DW=0.281)   |
|                                      | Invasive salmonellosis    | 0.210 | <b>Proxy health state</b> of <i>Infectious disease: acute episode, severe</i>                                                                              |

| Hazard                                    | Health state                     | DW    | Mapping                                                                                                                                                           |
|-------------------------------------------|----------------------------------|-------|-------------------------------------------------------------------------------------------------------------------------------------------------------------------|
| <i>Shigella</i> spp.                      | Diarrheal disease                | 0.101 | <b>Weighted average</b> of 73 % <i>Diarrhoea: mild</i> (DW=0.061); 25% <i>Diarrhoea: moderate</i> (DW=0.202); and 2% <i>Diarrhoea: severe</i> (DW=0.281)          |
| <i>Vibrio cholerae</i>                    | Diarrheal disease                | 0.194 | <b>Weighted average</b> of 25 % <i>Diarrhoea: mild</i> (DW=0.061); 40% <i>Diarrhoea: moderate</i> (DW=0.202); and 35% <i>Diarrhoea: severe</i> (DW=0.281)         |
| <i>Cryptosporidium</i> spp.               | Diarrheal disease                | 0.074 | <b>Weighted average</b> of 91% <i>Diarrhoea: mild</i> (DW=0.061); 8.5% <i>Diarrhoea: moderate</i> (DW=0.202); and 0.5% <i>Diarrhoea: severe</i> (DW=0.281)        |
| <i>Entamoeba histolytica</i>              | Diarrheal disease                | 0.074 | <b>Weighted average</b> of 91% <i>Diarrhoea: mild</i> (DW=0.061); 8.5% <i>Diarrhoea: moderate</i> (DW=0.202); and 0.5% <i>Diarrhoea: severe</i> (DW=0.281)        |
| <i>Giardia</i> spp.                       | Diarrheal disease                | 0.074 | <b>Weighted average</b> of 91% <i>Diarrhoea: mild</i> (DW=0.061); 8.5% <i>Diarrhoea: moderate</i> (DW=0.202); and 0.5% <i>Diarrhoea: severe</i> (DW=0.281)        |
| <i>Invasive enteric hazards</i>           |                                  |       |                                                                                                                                                                   |
| Hepatitis A Virus                         | Hepatitis                        | 0.108 | <b>Weighted average</b> of 50% <i>Infectious disease: acute episode, mild</i> (DW=0.005); and 50% <i>Infectious disease: acute episode, severe</i> (DW=0.210)     |
| <i>Brucella</i> spp.                      | Acute brucellosis                | 0.132 | <b>Weighted average</b> of 50% <i>Infectious disease: acute episode, moderate</i> (DW=0.053); and 50% <i>Infectious disease: acute episode, severe</i> (DW=0.210) |
|                                           | Chronic brucellosis              | 0.079 | <b>Proxy health state</b> of <i>Musculoskeletal problems: legs, moderate</i>                                                                                      |
|                                           | Orchitis                         | 0.097 | <b>Mapped health state</b> of <i>Epididymo-orchitis</i>                                                                                                           |
| <i>Listeria monocytogenes</i> , perinatal | Sepsis                           | 0.210 | <b>Proxy health state</b> of <i>Infectious disease: acute episode, severe</i>                                                                                     |
|                                           | Central nervous system infection | 0.426 | <b>Weighted average</b> ; see [Maertens de Noordhout et al. 2014]                                                                                                 |
|                                           | Neurological sequelae            | 0.292 | <b>Weighted average</b> ; see [Maertens de Noordhout et al. 2014]                                                                                                 |

| <b>Hazard</b>                            | <b>Health state</b>                  | <b>DW</b> | <b>Mapping</b>                                                                                                           |
|------------------------------------------|--------------------------------------|-----------|--------------------------------------------------------------------------------------------------------------------------|
| <i>Listeria monocytogenes</i> , acquired | Sepsis                               | 0.210     | <b>Proxy health state</b> of <i>Infectious disease: acute episode, severe</i>                                            |
|                                          | Central nervous system infection     | 0.426     | <b>Weighted average</b> ; see [Maertens de Noordhout et al. 2014] for details                                            |
|                                          | Neurological sequelae                | 0.292     | <b>Weighted average</b> ; see [Maertens de Noordhout et al. 2014] for details                                            |
| <i>Mycobacterium bovis</i>               | Tuberculosis                         | 0.331     | <b>Mapped health state</b> of <i>Tuberculosis: without HIV infection</i>                                                 |
| <i>Salmonella</i> Paratyphi              | Paratyphoid fever                    | 0.210     | <b>Proxy health state</b> of <i>Infectious disease: acute episode, severe</i>                                            |
|                                          | Liver abscesses and cysts            | 0.254     | <b>Proxy health state</b> of <i>Infectious disease: post-acute consequences (fatigue, emotional lability, insomnia)</i>  |
| <i>Salmonella</i> Typhi                  | Typhoid fever                        | 0.210     | <b>Proxy health state</b> of <i>Infectious disease: acute episode, severe</i>                                            |
|                                          | Liver abscesses and cysts            | 0.254     | <b>Proxy health state</b> of <i>Infectious disease: post-acute consequences (fatigue, emotional lability, insomnia)</i>  |
| <i>Toxoplasma gondii</i> , congenital    | Intracranial calcification           | 0.010     | <b>Proxy health state</b> ; see [Havelaar et al. 2007] for details                                                       |
|                                          | Hydrocephalus                        | 0.360     | <b>Weighted average</b> ; see [Havelaar et al. 2007] for details                                                         |
|                                          | Chorioretinitis, 1st year of life    | 0.033     | <b>Proxy health state</b> of <i>Distance vision: moderate impairment</i>                                                 |
|                                          | Chorioretinitis, later in life       | 0.033     | <b>Proxy health state</b> of <i>Distance vision: moderate impairment</i>                                                 |
|                                          | Central nervous system abnormalities | 0.360     | <b>Weighted average</b> ; see [Havelaar et al. 2007] for details                                                         |
| <i>Toxoplasma gondii</i> , acquired      | Chorioretinitis, mild                | 0.004     | <b>Proxy health state</b> of <i>Distance vision: mild impairment</i>                                                     |
|                                          | Chorioretinitis, moderate            | 0.033     | <b>Proxy health state</b> of <i>Distance vision: moderate impairment</i>                                                 |
|                                          | Chorioretinitis, severe              | 0.191     | <b>Proxy health state</b> of <i>Distance vision: severe impairment</i>                                                   |
|                                          | Acute illness                        | 0.053     | <b>Mapped health state</b> of <i>Infectious disease: acute episode, moderate</i>                                         |
|                                          | Post-acute illness                   | 0.254     | <b>Mapped health state</b> of <i>Infectious disease: post-acute consequences (fatigue, emotional lability, insomnia)</i> |
| <i>Enteric intoxications</i>             |                                      |           |                                                                                                                          |
| <i>Bacillus cereus</i> <sup>a</sup>      | Acute intoxication                   | 0.061     | <b>Proxy health state</b> of <i>Diarrhoea: mild</i>                                                                      |

| <b>Hazard</b>                                                | <b>Health state</b>                            | <b>DW</b> | <b>Mapping</b>                                                                            |
|--------------------------------------------------------------|------------------------------------------------|-----------|-------------------------------------------------------------------------------------------|
| <i>Clostridium botulinum</i> <sup>a</sup>                    | Moderate/mild botulism                         | 0.198     | <b>Proxy health state</b> of <i>Multiple sclerosis: mild</i>                              |
|                                                              | Severe botulism                                | 0.445     | <b>Proxy health state</b> of <i>Multiple sclerosis: moderate</i>                          |
| <i>Clostridium perfringens</i> <sup>a</sup>                  | Acute intoxication                             | 0.061     | <b>Proxy health state</b> of <i>Diarrhoea: mild</i>                                       |
| <i>Staphylococcus aureus</i> <sup>a</sup>                    | Acute intoxication                             | 0.061     | <b>Proxy health state</b> of <i>Diarrhoea: mild</i>                                       |
| <b>Cestodes</b>                                              |                                                |           |                                                                                           |
| <i>Echinococcus granulosus</i> , cases seeking treatment     | Pulmonary cystic echinococcosis                | 0.192     | <b>Proxy health state</b> of <i>COPD and other chronic respiratory diseases: moderate</i> |
|                                                              | Hepatic cystic echinococcosis                  | 0.123     | <b>Proxy health state</b> of <i>Abdominopelvic problem: moderate</i>                      |
|                                                              | Central nervous system cystic echinococcosis   | 0.221     | <b>Proxy health state</b> of <i>Motor plus cognitive impairments: moderate</i>            |
| <i>Echinococcus granulosus</i> , cases not seeking treatment | Pulmonary cystic echinococcosis                | 0.015     | <b>Proxy health state</b> of <i>COPD and other chronic respiratory diseases: mild</i>     |
|                                                              | Hepatic cystic echinococcosis                  | 0.012     | <b>Proxy health state</b> of <i>Abdominopelvic problem: mild</i>                          |
|                                                              | Central nervous system cystic echinococcosis   | 0.054     | <b>Proxy health state</b> of <i>Motor plus cognitive impairments: mild</i>                |
| <i>Echinococcus multilocularis</i>                           | Alveolar echinococcosis                        | 0.123     | <b>Proxy health state</b> of <i>Abdominopelvic problem: moderate</i>                      |
| <i>Taenia solium</i>                                         | Epilepsy: treated, seizure free                | 0.072     | <b>Mapped health state</b> of <i>Epilepsy: treated, seizure free</i>                      |
|                                                              | Epilepsy: treated, with recent seizures        | 0.319     | <b>Mapped health state</b> of <i>Epilepsy: treated, with recent seizures</i>              |
|                                                              | Epilepsy: severe                               | 0.657     | <b>Mapped health state</b> of <i>Epilepsy: severe</i>                                     |
|                                                              | Epilepsy: untreated                            | 0.420     | <b>Mapped health state</b> of <i>Epilepsy: untreated</i>                                  |
| <b>Nematodes</b>                                             |                                                |           |                                                                                           |
| <i>Ascaris</i> spp.                                          | Ascariasis infestation                         | 0.030     | <b>Mapped health state</b> of <i>Intestinal nematode infections: symptomatic</i>          |
|                                                              | Mild abdominopelvic problems due to ascariasis | 0.012     | <b>Mapped health state</b> of <i>Abdominopelvic problem: mild</i>                         |

| <b>Hazard</b>                  | <b>Health state</b>                                              | <b>DW</b>          | <b>Mapping</b>                                                                                                                                                                                                                                                                                   |
|--------------------------------|------------------------------------------------------------------|--------------------|--------------------------------------------------------------------------------------------------------------------------------------------------------------------------------------------------------------------------------------------------------------------------------------------------|
|                                | Severe wasting due to ascariasis                                 | 0.127              | <b>Mapped health state</b> of <i>Severe wasting</i>                                                                                                                                                                                                                                              |
| <i>Trichinella</i> spp.        | Acute clinical trichinellosis                                    | 0.637              | <b>Aggregate</b> of <i>Diarrhoea: moderate</i> (DW = 0.202); <i>Disfigurement: level 2, with itch or pain</i> (DW = 0.187); <i>Musculoskeletal problems: generalised, moderate</i> (DW = 0.292); and <i>Infectious disease: acute episode, severe</i> (DW = 0.210) [Devleesschauwer et al. 2014] |
| <i>Trematodes</i>              |                                                                  |                    |                                                                                                                                                                                                                                                                                                  |
| <i>Clonorchis sinensis</i>     | Abdominopelvic problems due to heavy clonorchiosis               | 0.123              | <b>Proxy health state</b> of <i>Abdominopelvic problem: moderate</i>                                                                                                                                                                                                                             |
| <i>Fasciola hepatica</i>       | Abdominopelvic problems due to heavy fasciolosis                 | 0.123              | <b>Proxy health state</b> of <i>Abdominopelvic problem: moderate</i>                                                                                                                                                                                                                             |
| Intestinal flukes <sup>b</sup> | Abdominopelvic problems due to heavy intestinal fluke infections | 0.123              | <b>Proxy health state</b> of <i>Abdominopelvic problem: moderate</i>                                                                                                                                                                                                                             |
| <i>Opisthorchis</i> spp.       | Abdominopelvic problems due to heavy opisthorchiosis             | 0.123              | <b>Proxy health state</b> of <i>Abdominopelvic problem: moderate</i>                                                                                                                                                                                                                             |
| <i>Paragonimus</i> spp.        | Central nervous system problems due to heavy paragonimosis       | 0.420              | <b>Proxy health state</b> of <i>Epilepsy: untreated</i>                                                                                                                                                                                                                                          |
|                                | Pulmonary problems due to heavy paragonimosis                    | 0.132              | <b>Proxy health state</b> of <i>Asthma: uncontrolled</i>                                                                                                                                                                                                                                         |
| <i>Organic pollutants</i>      |                                                                  |                    |                                                                                                                                                                                                                                                                                                  |
| Dioxin                         | Infertility                                                      | 0.056 <sup>c</sup> | <b>Mapped health state</b> of <i>Infertility: primary</i>                                                                                                                                                                                                                                        |
|                                | Hypothyroidy due to prenatal exposure                            | 0.019 <sup>d</sup> | <b>Mapped health state</b> of <i>Hypothyroidy</i>                                                                                                                                                                                                                                                |
|                                | Hypothyroidy due postnatal exposure                              | 0.019 <sup>d</sup> | <b>Mapped health state</b> of <i>Hypothyroidy</i>                                                                                                                                                                                                                                                |

| Hazard                        | Health state                                                | DW    | Mapping                                                                                                                                                                       |
|-------------------------------|-------------------------------------------------------------|-------|-------------------------------------------------------------------------------------------------------------------------------------------------------------------------------|
| <i>Toxins and allergens</i>   |                                                             |       |                                                                                                                                                                               |
| Aflatoxin                     | Hepatocellular carcinoma: diagnosis and primary therapy     | 0.294 | <b>Mapped health state</b> of <i>Cancer: diagnosis and primary therapy</i>                                                                                                    |
|                               | Hepatocellular carcinoma: metastatic                        | 0.484 | <b>Mapped health state</b> of <i>Cancer: metastatic</i>                                                                                                                       |
|                               | Hepatocellular carcinoma: terminal phase with medication    | 0.508 | <b>Mapped health state</b> of <i>Cancer: terminal phase with medication</i>                                                                                                   |
|                               | Hepatocellular carcinoma: terminal phase without medication | 0.519 | <b>Mapped health state</b> of <i>Cancer: terminal phase without medication</i>                                                                                                |
| Cyanide in cassava            | Konzo                                                       | 0.065 | <b>Weighted average</b> of 63% <i>Motor impairment: mild</i> (DW=0.012); 27% <i>Motor impairment: moderate</i> (DW=0.076); and 10% <i>Motor impairment: severe</i> (DW=0.377) |
| Peanut allergens <sup>a</sup> | Living with peanut-induced allergy                          | 0.012 | <b>Weighted average</b> of 94% <i>Asthma: controlled</i> (DW=0.009); and 6% <i>Generic uncomplicated disease: anxiety about diagnosis</i> (DW=0.054)                          |

<sup>a</sup> Excluded from global burden assessments.

<sup>b</sup> Includes *Echinostoma* spp., *Fasciolopsis buski*, *Heterophyes* spp., *Metagonimus* spp. and other foodborne intestinal trematode species.

<sup>c</sup> Value taken from the World Health Organization Global Health Estimates (WHO 2013); note the higher value compared to GBD 2010 (Salomon et al. 2012).

<sup>d</sup> Value taken from the GBD 2013 disability weights (Salomon et al. 2015).

## References

1. de Noordhout CM, Devleesschauwer B, Angulo FJ, Verbeke G, Haagsma J, Kirk M et al. (2014) The global burden of listeriosis: a systematic review and meta-analysis. *Lancet Infect Dis*. doi: 10.1016/S1473-3099(14)70870-9.
2. Devleesschauwer B, Praet N, Speybroeck N, Torgerson PR, Haagsma JA, De Smet K, et al. (2014) The low global burden of trichinellosis: evidence and implications. *Int J Parasitol*. doi:10.1016/j.ijpara.2014.05.006.
3. Havelaar AH, Kemmeren JM, Kortbeek LM (2007) Disease burden of congenital toxoplasmosis. *Clin Infect Dis* 44(11): 1467-1474.
4. Salomon JA, Vos T, Hogan DR, Gagnon M, Naghavi M, Mokdad A, et al. (2012) Common values in assessing health outcomes from disease and injury: disability weights measurement study for the Global Burden of Disease Study 2010. *Lancet* 380(9859): 2129-2143. doi:10.1016/S0140-6736(12)61680-8.
5. Salomon JA, Haagsma JA, Davis A, Maertens de Noordhout C, Polinder S, Havelaar AH, et al. (2015) Disability weights for the Global Burden of Disease 2013 study. *Lancet Glob Health* 3(11): e712–e723. doi: 10.1016/S2214-109X(15)00069-8.
6. World Health Organization (2013) WHO methods and data sources for global burden of disease estimates 2000-2011. *Global Health Estimates Technical Paper*. WHO/HIS/HSI/GHE/2013.4. Available: [http://www.who.int/healthinfo/statistics/GlobalDALYmethods\\_2000\\_2011.pdf](http://www.who.int/healthinfo/statistics/GlobalDALYmethods_2000_2011.pdf). Accessed 13 April 2015.
